# Prompt rewetting of drained peatlands reduces climate warming despite methane emissions

Anke Günther<sup>1\*</sup>, Alexandra Barthelmes<sup>2,3</sup>, Vytas Huth<sup>1</sup>, Hans Joosten<sup>2,3</sup>, Gerald Jurasinski<sup>1</sup>,  
Franziska Koebsch<sup>1</sup>, John Couwenberg<sup>2,3</sup>

5

<sup>1</sup>University of Rostock, Faculty of Agricultural and Environmental Studies, Landscape Ecology,  
Rostock, Germany

<sup>2</sup>University of Greifswald, Faculty of Mathematics and Natural Sciences, Peatland Studies and  
Paleoecology, Greifswald, Germany

10 <sup>3</sup>Greifswald Mire Centre (GMC), Greifswald Germany

\*Corresponding author: [anke.guenther@uni-rostock.de](mailto:anke.guenther@uni-rostock.de)

Peatlands are strategic areas for climate change mitigation because of their matchless carbon

15 stocks<sup>1-4</sup>. Drained peatlands release this carbon to the atmosphere as carbon dioxide (CO<sub>2</sub>)<sup>5,6</sup>.

Peatland rewetting effectively stops these CO<sub>2</sub> emissions<sup>7,8</sup>, but also re-establishes the emission of methane (CH<sub>4</sub>)<sup>9,10</sup>. Essentially, management must choose between CO<sub>2</sub> emissions from drained or

CH<sub>4</sub> emissions from rewetted peatland. This choice must consider the radiative effects as well as the atmospheric lifetimes of both gases, with CO<sub>2</sub> being a weak but persistent and CH<sub>4</sub> a strong

20 but short-lived greenhouse gas<sup>11</sup>. The resulting climatic effects are, thus, strongly time-dependent.

Yet, common metrics like global warming potential (GWP) and its 'sustained flux' variants<sup>12,13</sup> fail to account for temporal dynamics and how these relate to expected global warming dynamics.

We used a radiative forcing model to compare forcing dynamics of global scenarios for future

peatland management using areal data from the Global Peatland Database<sup>14</sup>. Our results show that

25 CH<sub>4</sub> radiative forcing does not undermine the climate change mitigation potential of peatland

rewetting. Instead, postponing rewetting increases the long-term warming effect of continued

CO<sub>2</sub> emissions. Unlike CO<sub>2</sub> (and N<sub>2</sub>O) from drained peatlands that accumulates in the atmosphere, possible CH<sub>4</sub> emission spikes upon rewetting do not add to expected peak warming when

rewetting occurs before 2050. Warnings against high CH<sub>4</sub> emissions from rewetted peatlands<sup>9</sup> are

30 therefore unjustified.

Each year, drained peatlands worldwide emit ~2 Gt carbon dioxide (CO<sub>2</sub>) by microbial peat

oxidation or peat fires, causing ~5 % of all anthropogenic greenhouse gas emissions on only 0.3 %

of the global land surface<sup>3</sup>. Peatland rewetting has been identified as a cost-effective measure to

curb these emissions<sup>15</sup>, but may be associated with elevated emissions of CH<sub>4</sub> (<sup>16-19</sup>). In light of the

35 strong and not yet completely understood impact of CH<sub>4</sub> on global warming<sup>20,21</sup> it may seem

imprudent to knowingly create or restore an additional source.

The trade-off between CH<sub>4</sub> emissions with and CO<sub>2</sub> emissions without rewetting is, however, not straightforward: CH<sub>4</sub> has a much larger radiative efficiency than CO<sub>2</sub> <sup>(11)</sup>. Yet, the huge differences in atmospheric lifetime lead to strongly time-dependent outcomes, especially regarding the question when the maximum climate effect of various management scenarios will occur and how this will affect peak global warming (i.e. the maximum deviation in global surface temperatures relative to pre-industrial times). Radiative forcing of the long-term GHGs (in case of peatlands: CO<sub>2</sub> and N<sub>2</sub>O) is determined by *cumulative* emissions, because they factually accumulate in the atmosphere. In contrast, radiative forcing of near-term climate forcers (in case of rewetted peatlands: CH<sub>4</sub>) depends on the contemporary emission *rate* multiplied with the atmospheric lifetime<sup>11,12</sup>, because resulting atmospheric concentrations, also in case of sustained emissions, quickly reach a steady state of decay and removal.

Here, we explore how the different lifetimes of CO<sub>2</sub>/N<sub>2</sub>O vs. CH<sub>4</sub> play out when assessing options for peatland rewetting as a climate warming mitigation practice. We compare the following global scenarios:

- ‘Drain\_More’: The area of drained peatland continues to increase from 2020 to 2100 at the same rate as between 1990 and 2017
- ‘No\_Change’: The area of drained peatland remains at the 2018 level
- ‘Rewet\_All\_Now’: All drained peatlands are rewetted in the period 2020-2040
- ‘Rewet\_Half\_Now’: Half of all drained peatlands are rewetted in the period 2020-2040
- ‘Rewet\_All\_Later’: All drained peatlands are rewetted in the period 2050-2070

These scenarios represent extreme management options and exemplify the differences caused by timing and extent of rewetting. For our modeling exercise, we assume that the maximum peatland

60 area to be drained during the 21<sup>st</sup> century equals the area that is already drained in 2018 (505,680 km<sup>2</sup>, Global Peatland Database<sup>14</sup>) plus an additional ~5,000 km<sup>2</sup> per year (average rate of new peatland drainage between 1990 and 2017<sup>22</sup>). We apply IPCC default emissions factors<sup>23</sup> and test the influence of CH<sub>4</sub> emissions by adding an initial strong CH<sub>4</sub> spike (10 times the natural emissions for the first 3 years), as has occasionally been reported<sup>17,18</sup>. To compare the radiative forcing effects of the different GHGs, we use a simplified atmospheric perturbation model that has been shown to provide reliable estimates of the climatic effects of peatlands<sup>24</sup> (see Methods).

We find that immediate rewetting of all drained peatlands quickly leads to climatic benefits compared to keeping the *status quo* (Figure 1, break-even point ~6 years after last peatland rewetting). Before the break-even, CH<sub>4</sub> emissions including the strong emission spike assumed for 70 the first years after rewetting create a warming overshoot. Peatlands should, therefore, be rewetted before 2050 to prevent the CH<sub>4</sub> overshoot to exacerbate peak warming, which AR5 climate models expect to occur after ~2060<sup>25</sup> (Figure 1).

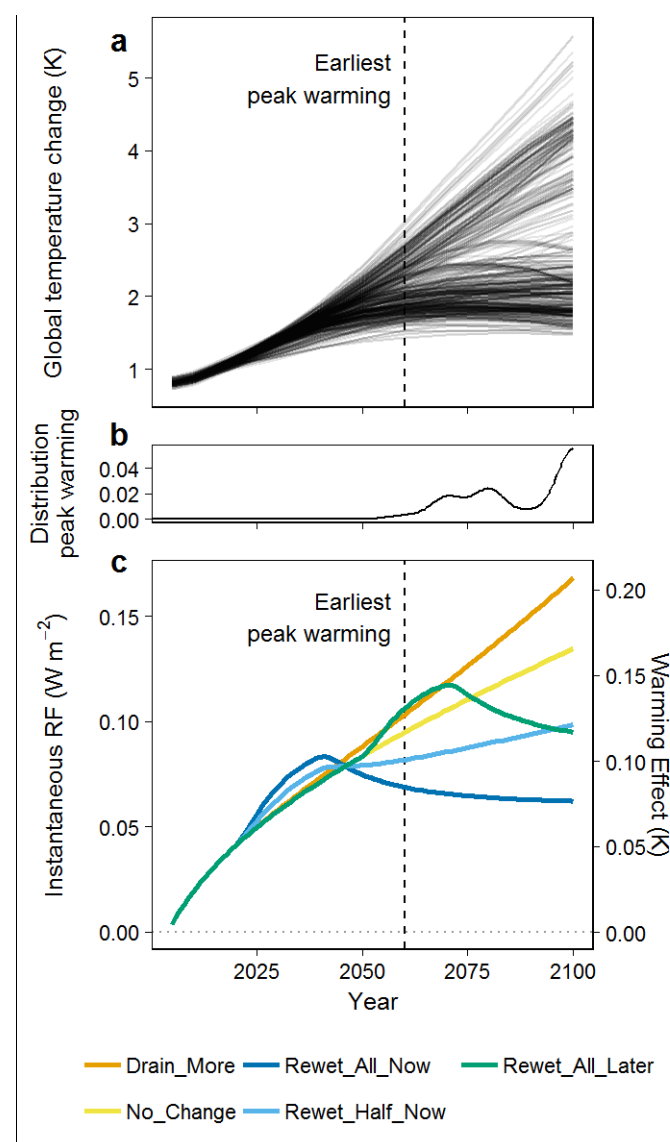

Figure 1 Climatic effects of peatland management in relation to global warming. Mean global temperature change relative to 2005 (a) and frequency distribution of the timing of peak warming (b) according to AR5 (MAGICC) models<sup>25</sup> are shown compared to radiative forcings (RF) and estimated warming effects of global peatland management scenarios (panel c, own calculations). Please note that panel c) does not include forcing of peatlands that remain pristine.

The overall climatic effect of peatland rewetting is indeed strongly determined by the radiative forcing of sustained  $\text{CH}_4$  emissions (Figure 2). However, because of the negligible or even negative emissions of  $\text{CO}_2/\text{N}_2\text{O}$  of rewetted peatlands and the short atmospheric lifetime of  $\text{CH}_4$ , radiative forcing of all three GHGs combined quickly reaches a plateau after rewetting. Meanwhile,

differences in radiative forcing between the scenarios are mainly determined by CO<sub>2</sub>. Rewetting only half of the currently drained peatlands (“Rewetting\_Half\_Now”) is not sufficient to establish stable radiative forcing. Instead, CO<sub>2</sub> from peatland drainage keeps accumulating in the atmosphere and warming the climate.

Comparing the scenarios “Rewet\_All\_Now” and “Rewet\_All\_Later” shows that timing of peatland rewetting is not only important in relation to peak temperature, but also with respect to the resulting total long-term forcing of CO<sub>2</sub> and N<sub>2</sub>O emissions (Figure 2). The sooner drained peatlands are rewetted, the better it is for the climate.

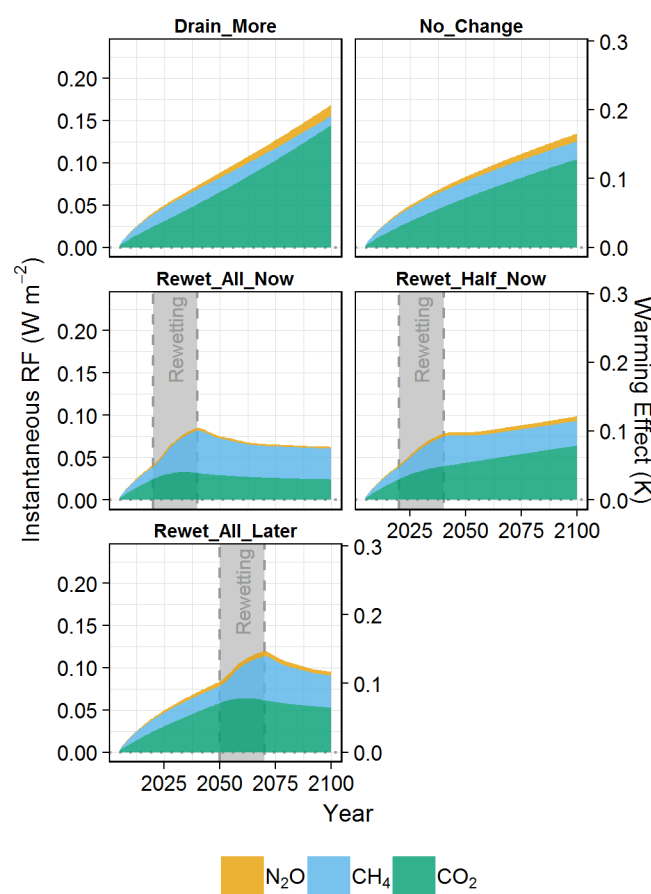

Figure 2 Contributions of the different GHGs (N<sub>2</sub>O, CH<sub>4</sub>, and CO<sub>2</sub>) to total radiative forcing (“RF”) and estimated warming effects in the modeled scenarios. The grey area shows the period of rewetting. Note that the figure does not include forcing of peatlands that remain pristine.

85 Our simulations highlight three general conclusions:

- The baseline or reference against which peatland rewetting has to be assessed is the drained state with its large CO<sub>2</sub> emissions. For this reason, rewetted peatlands that are found to emit more CH<sub>4</sub> than pristine ones<sup>19</sup> are no argument against rewetting.
- The climate effect is strongly dependent on timing of rewetting. This fact is insufficiently  
90 recognized and remains hidden when using metrics that involve predetermined time horizons (like GWP or sustained flux variants of GWP).
- In order to stabilize global climate, it is insufficient to focus rewetting efforts on selected peatlands only: CO<sub>2</sub> emissions from (almost) all drained peatlands have to be stopped by rewetting.

95 Limiting global warming requires immediate reduction of global GHG emissions. It has been suggested that the negative climate effects of drained peatlands could be offset by growing highly-productive bioenergy crops<sup>26</sup> or wood biomass<sup>27</sup> as substitute for fossil fuels. In this study, we did not include this option because wet cultivation methods ('paludiculture') could provide similar substitution benefits without CO<sub>2</sub> emissions from drained peat soil<sup>28</sup>.

100 In conclusion, without rewetting the world's drained peatlands will continue to emit CO<sub>2</sub>, with direct effects on the magnitude and timing of peak global warming. These CO<sub>2</sub> emissions can effectively be stopped by rewetting. Especially if we expect large CH<sub>4</sub> emission spikes upon rewetting, we should rewet as soon as possible, so that these CH<sub>4</sub> emissions contribute as little as possible to peak warming. Although the CH<sub>4</sub> cost of rewetting may temporarily be substantial, the  
105 CO<sub>2</sub> cost of inaction will be much higher.

# Methods

## *Scenarios*

Drained peatland area was taken from the Global Peatland Database (GPD)<sup>14</sup>. We used data separated by climate zone (boreal, temperate, and tropical) and assigned land use categories.

Available land use categories were “Forest”, “Cropland”, “Deep-drained grassland”, “Shallow-drained grassland”, “Agriculture” (i.e. either grassland or cropland), and “Peat extraction” (see Extended Data Table 1). Because of their only small area and uncertain emission factors, arctic drained peatlands (~100 kha) were neglected. New drained/rewetted area in the scenarios is distributed across the climatic zones (and land use classes) according to the relative proportions of today’s drained peatland area. For information on how variations in the assumed drainage rate and duration of the CH<sub>4</sub> peak affected the displayed radiative forcing effects of the scenarios please see Extended Data Fig. 1.

## *Emissions*

Emission factors for each climate zone and land use category were taken from the IPCC Wetland supplement<sup>23</sup>. Emission factors were averaged for IPCC categories that were given at a higher level of detail (e.g. nutrient-poor vs. nutrient-rich boreal forest) than the available land use categories from the GPD (see Extended Data Table 1). Equally, we averaged the supplied emission factors for grassland and cropland in order to obtain emission factors of the land use class “Agriculture”. We included emissions from ditches and DOC exports by using emission factors and default cover fraction of ditches given by the IPCC<sup>23</sup>. Since the IPCC Wetlands Supplement does not provide an emission factor for tropical peat extraction sites, we assumed the same emissions as for temperate/boreal peat extraction.



# *Radiative forcing model*

The model uses simple impulse-response functions<sup>29</sup> to estimate radiative forcing effects of

atmospheric perturbations of CO<sub>2</sub>, CH<sub>4</sub> and N<sub>2</sub>O fluxes<sup>13</sup>. For CO<sub>2</sub>, we adopted the flux fractions  
and perturbation lifetimes used by ref<sup>24</sup>. In the model, we assume a perfectly mixed atmosphere  
without any feedback mechanisms but include indirect effects of CH<sub>4</sub> on other reagents and  
aerosols<sup>11</sup>. We estimated the approximate effects of radiative forcing on global mean temperature  
as ~1.23 K per 1 W/m<sup>2</sup> radiative forcing<sup>30</sup>.

# References

1. Rumpel, C. *et al.* Put more carbon in soils to meet Paris climate pledges. *Nature* **564**, 32–34;  
10.1038/d41586-018-07587-4 (2018).
2. Griscom, B. W. *et al.* Natural climate solutions. *Proceedings of the National Academy of  
Sciences of the United States of America* **114**, 11645–11650; 10.1073/pnas.1710465114 (2017).
3. Joosten, H., Sirin, A., Couwenberg, J., Laine, A. & Smith, P. in *Peatland restoration and  
ecosystem services*, edited by A. Bonn, T. Allott, M. Evans, H. Joosten & R. Stoneman  
(Cambridge University Press, Cambridge, UK, 2016).
4. Joosten, H. & Couwenberg, J. in *Assessment on Peatlands, Biodiversity and Climate Change:  
Main Report*, edited by F. Parish, *et al.* (Global Environment Centre and Wetlands  
International, Kuala Lumpur and Wageningen, 2008), pp. 99–117.
5. Kandel, T., Lærke, P. E. & Elsgaard, L. Annual emissions of CO<sub>2</sub>, CH<sub>4</sub> and N<sub>2</sub>O from a  
temperate peat bog. Comparison of undrained and four drained sites under permanent grass  
and arable crop rotations with cereals and potato. *Agric. For. Meteorol.* **256–257**, 470–481  
(2018).

- 150 6. Tiemeyer, B. *et al.* High emissions of greenhouse gases from grasslands on peat and other organic soils. *Global Change Biol*; 10.1111/gcb.13303 (2016).
7. Wilson, D. *et al.* Greenhouse gas emission factors associated with rewetting of organic soils. *Mires and Peat* **17**, 1–28 (2016).
8. Hemes, K. S. *et al.* Assessing the carbon and climate benefit of restoring degraded agricultural  
155 peat soils to managed wetlands. *Agricultural and Forest Meteorology* **268**, 202–214; 10.1016/j.agrformet.2019.01.017 (2019).
9. Wilson, D. *et al.* Rewetting of cutaway peatlands: are we re-creating hot spots of methane emissions? *Restor Ecol* **17**, 796–806; 10.1111/j.1526-100X.2008.00416.x (2009).
10. Baldocchi, D. & Penuelas, J. The physics and ecology of mining carbon dioxide from the  
160 atmosphere by ecosystems. *Global Change Biol*; 10.1111/gcb.14559 (2018).
11. Myhre, G. *et al.* in *Climate change 2013*, edited by T. F. Stocker, *et al.* (Cambridge University Press, Cambridge, UK and New York, USA, 2013), pp. 659–740.
12. Allen, M. R. *et al.* A solution to the misrepresentations of CO<sub>2</sub>-equivalent emissions of short-lived climate pollutants under ambitious mitigation. *npj Clim Atmos Sci* **1**, 1–8; 10.1038/s41612-018-0026-8 (2018).  
165
13. Neubauer, S. C. & Megonigal, J. P. Moving beyond Global Warming Potentials to quantify the climatic role of ecosystems. *Ecosystems* **18**, 1000–1013; 10.1007/s10021-015-9879-4 (2015).
14. Greifswald Mire Centre. Global Peatland Database. Available at <https://greifswaldmoor.de/global-peatland-database-en.html> (2019).

- 170 15. Leifeld, J. & Menichetti, L. The underappreciated potential of peatlands in global climate  
change mitigation strategies. *Nature communications* **9**, 1–8; 10.1038/s41467-018-03406-6  
(2018).
16. Abdalla, M. *et al.* Emissions of methane from northern peatlands: a review of management  
impacts and implications for future management options. *Ecology and Evolution* **6**, 7080–7102;  
175 10.1002/ece3.2469 (2016).
17. Franz, D., Koebsch, F., Larmanou, E., Augustin, J. & Sachs, T. High net CO<sub>2</sub> and CH<sub>4</sub> release at  
a eutrophic shallow lake on a formerly drained fen. *Biogeosciences* **13**, 3051–3070; 10.5194/bg-  
13-3051-2016 (2016).
18. Hahn, J., Köhler, S., Glatzel, S. & Jurasinski, G. Methane exchange in a coastal fen in the first  
180 year after flooding - A systems shift. *PLoS ONE* **10**, 1–25; 10.1371/journal.pone.0140657  
(2015).
19. Hemes, K. S., Chamberlain, S. D., Eichelmann, E., Knox, S. H. & Baldocchi, D. D. A  
biogeochemical compromise. The high methane cost of sequestering carbon in restored  
wetlands. *Geophys. Res. Lett.* **121**, 777; 10.1029/2018GL077747 (2018).
- 185 20. Nisbet, E. G. *et al.* Very strong atmospheric methane growth in the four years 2014-2017:  
Implications for the Paris Agreement. *Global Biogeochem. Cycles*; 10.1029/2018GB006009  
(2019).
21. Mikaloff Fletcher, S. E. & Schaefer, H. Rising methane: A new climate challenge. *Science* **364**,  
932–933 (2019).
- 190 22. Joosten, H. The development of peatland emissions until 2030: a reconnaissance. *IMCG*  
*Bulletin* **9**, 4–8 (2017).

23. 2013 Supplement to the 2006 Guidelines for National Greenhouse Gas Inventories: Wetlands.

Intergovernmental Panel on Climate Change (IPCC), 2014.

24. Dommain, R. *et al.* A radiative forcing analysis of tropical peatlands before and after their

195 conversion to agricultural plantations. *Global Change Biol*; 10.1111/gcb.14400 (2018).

25. IIASA Energy Program. IAMC AR5 Scenario Database. Available at

<https://secure.iiasa.ac.at/web-apps/ene/AR5DB> (2014).

26. Järveoja, J. *et al.* Mitigation of greenhouse gas emissions from an abandoned Baltic peat

extraction area by growing reed canary grass: life-cycle assessment. *Reg Environ Change* **13**,

200 781–795; 10.1007/s10113-012-0355-9 (2013).

27. Minkinen, K. *et al.* Persistent carbon sink at a boreal drained bog forest. *Biogeosciences* **15**,

3603–3624; 10.5194/bg-15-3603-2018 (2018).

28. Wichtmann, W., Schröder, C. & Joosten, H. (eds.). *Paludiculture - productive use of wet*

*peatlands. Climate protection - biodiversity - regional economic benefits* (Schweizerbart

205 Science Publishers, Stuttgart, Germany, 2016).

29. Joos, F. *et al.* Carbon dioxide and climate impulse response functions for the computation of

greenhouse gas metrics. A multi-model analysis. *Atmos. Chem. Phys.* **13**, 2793–2825;

10.5194/acp-13-2793-2013 (2013).

30. Stocker, T. F. *et al.* in *Climate change 2013*, edited by T. F. Stocker, *et al.* (Cambridge

210 University Press, Cambridge, UK and New York, USA, 2013), pp. 33–118.

## Acknowledgements

The European Social Fund (ESF) and the Ministry of Education, Science and Culture of Mecklenburg-Western Pomerania funded this work within the scope of the project WETSCAPES (ESF/14-BM-A55-0030/16 and ESF/14-BM-A55-0031/16). G. J. received funding within the framework of the Research Training Group Baltic TRANSCOAST from the DFG (Deutsche Forschungsgemeinschaft) under grant number GRK 2000/1. This is Baltic TRANSCOAST publication no. GRK2000/00XX. V. H. gratefully acknowledges funding by the Federal Agency of Nature Conservation (BfN, grant number: 3516892003) and by the European Regional Development Fund (ERDF) distributed through the NBank.

## Author contributions

A. G., J. C., G. J. and V.H. conceived the study. A. G., A. B., J. C., H. J. assembled input data. A. G. implemented the simulation model with contributions from J. C. All authors discussed the results and implications. A. G. led writing of the manuscript with comments/edits from all authors.

## Author information

The authors declare no competing interests.
